# Supplementary material
Source: MDPI journal article supplement (https://www.mdpi.com/2076-3298/10/6/103)
Supplement: s1 [file s1]

## Supplementary Figure and Table

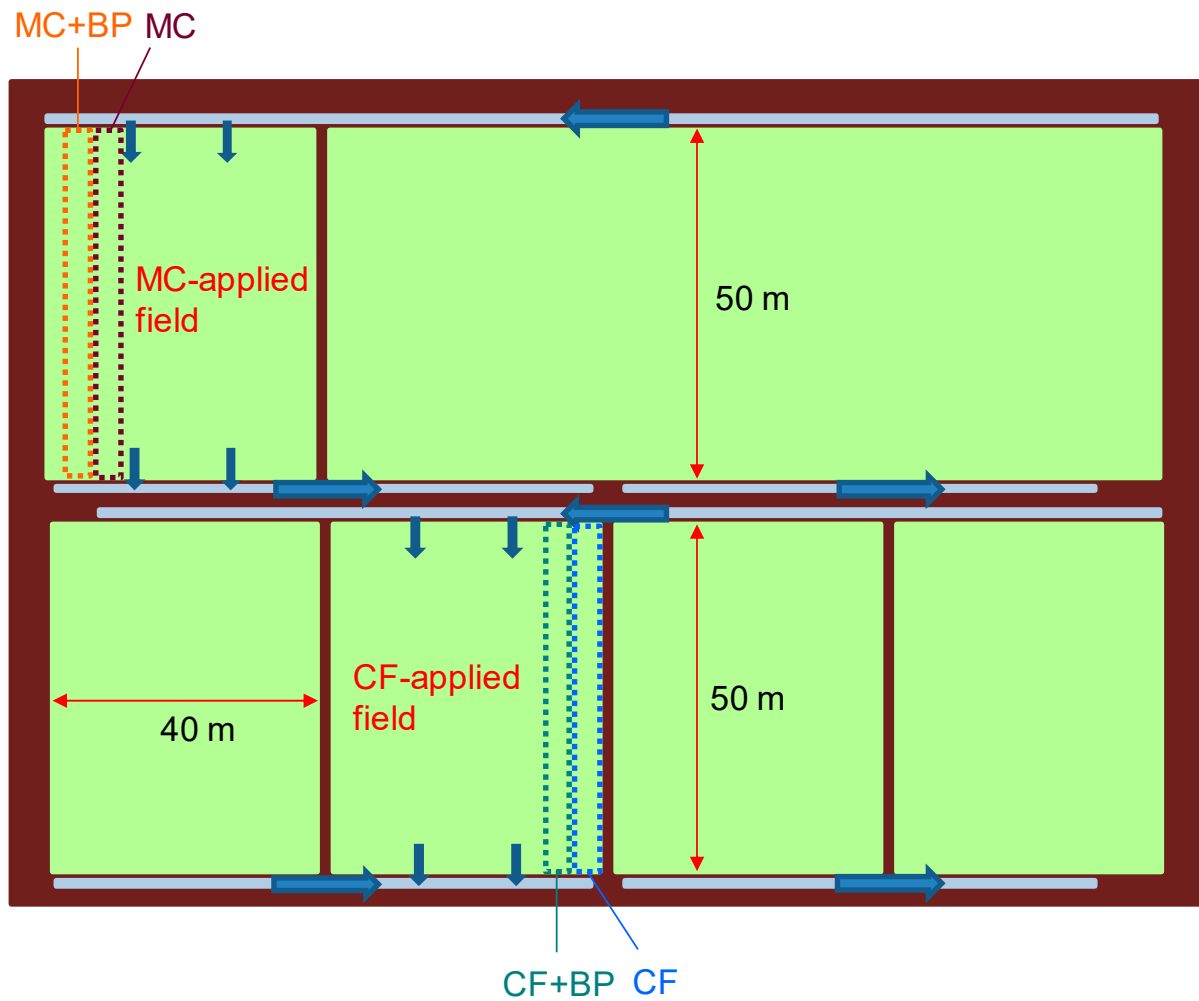

Figure S1. Schematic representation of the allophanic andosol fields with irrigation system. Blue arrows and dotted squares indicate directions of water flow and soil sampling plots, respectively.

Table S1. Weights of total body, straw, unfulled rice grain, and brown rice grain.

| Year |         | Weight (kg/10 a) |       |                     |                  |
|------|---------|------------------|-------|---------------------|------------------|
|      |         | Total body       | Straw | Unfulled rice grain | Brown rice grain |
| 2020 | CF      | 1458             | 762   | 696                 | 556              |
|      | CF + BP | 1437             | 744   | 693                 | 540              |
|      | MC      | 1546             | 884   | 662                 | 497              |
|      | MC + BP | 1483             | 855   | 628                 | 484              |
